# Supplementary material
Source: PubMed Central journal article supplement (PMC3697615)
Supplement: IAI.00147-13_zii999090212so1.pdf [file IAI.00147-13_zii999090212so1.pdf]

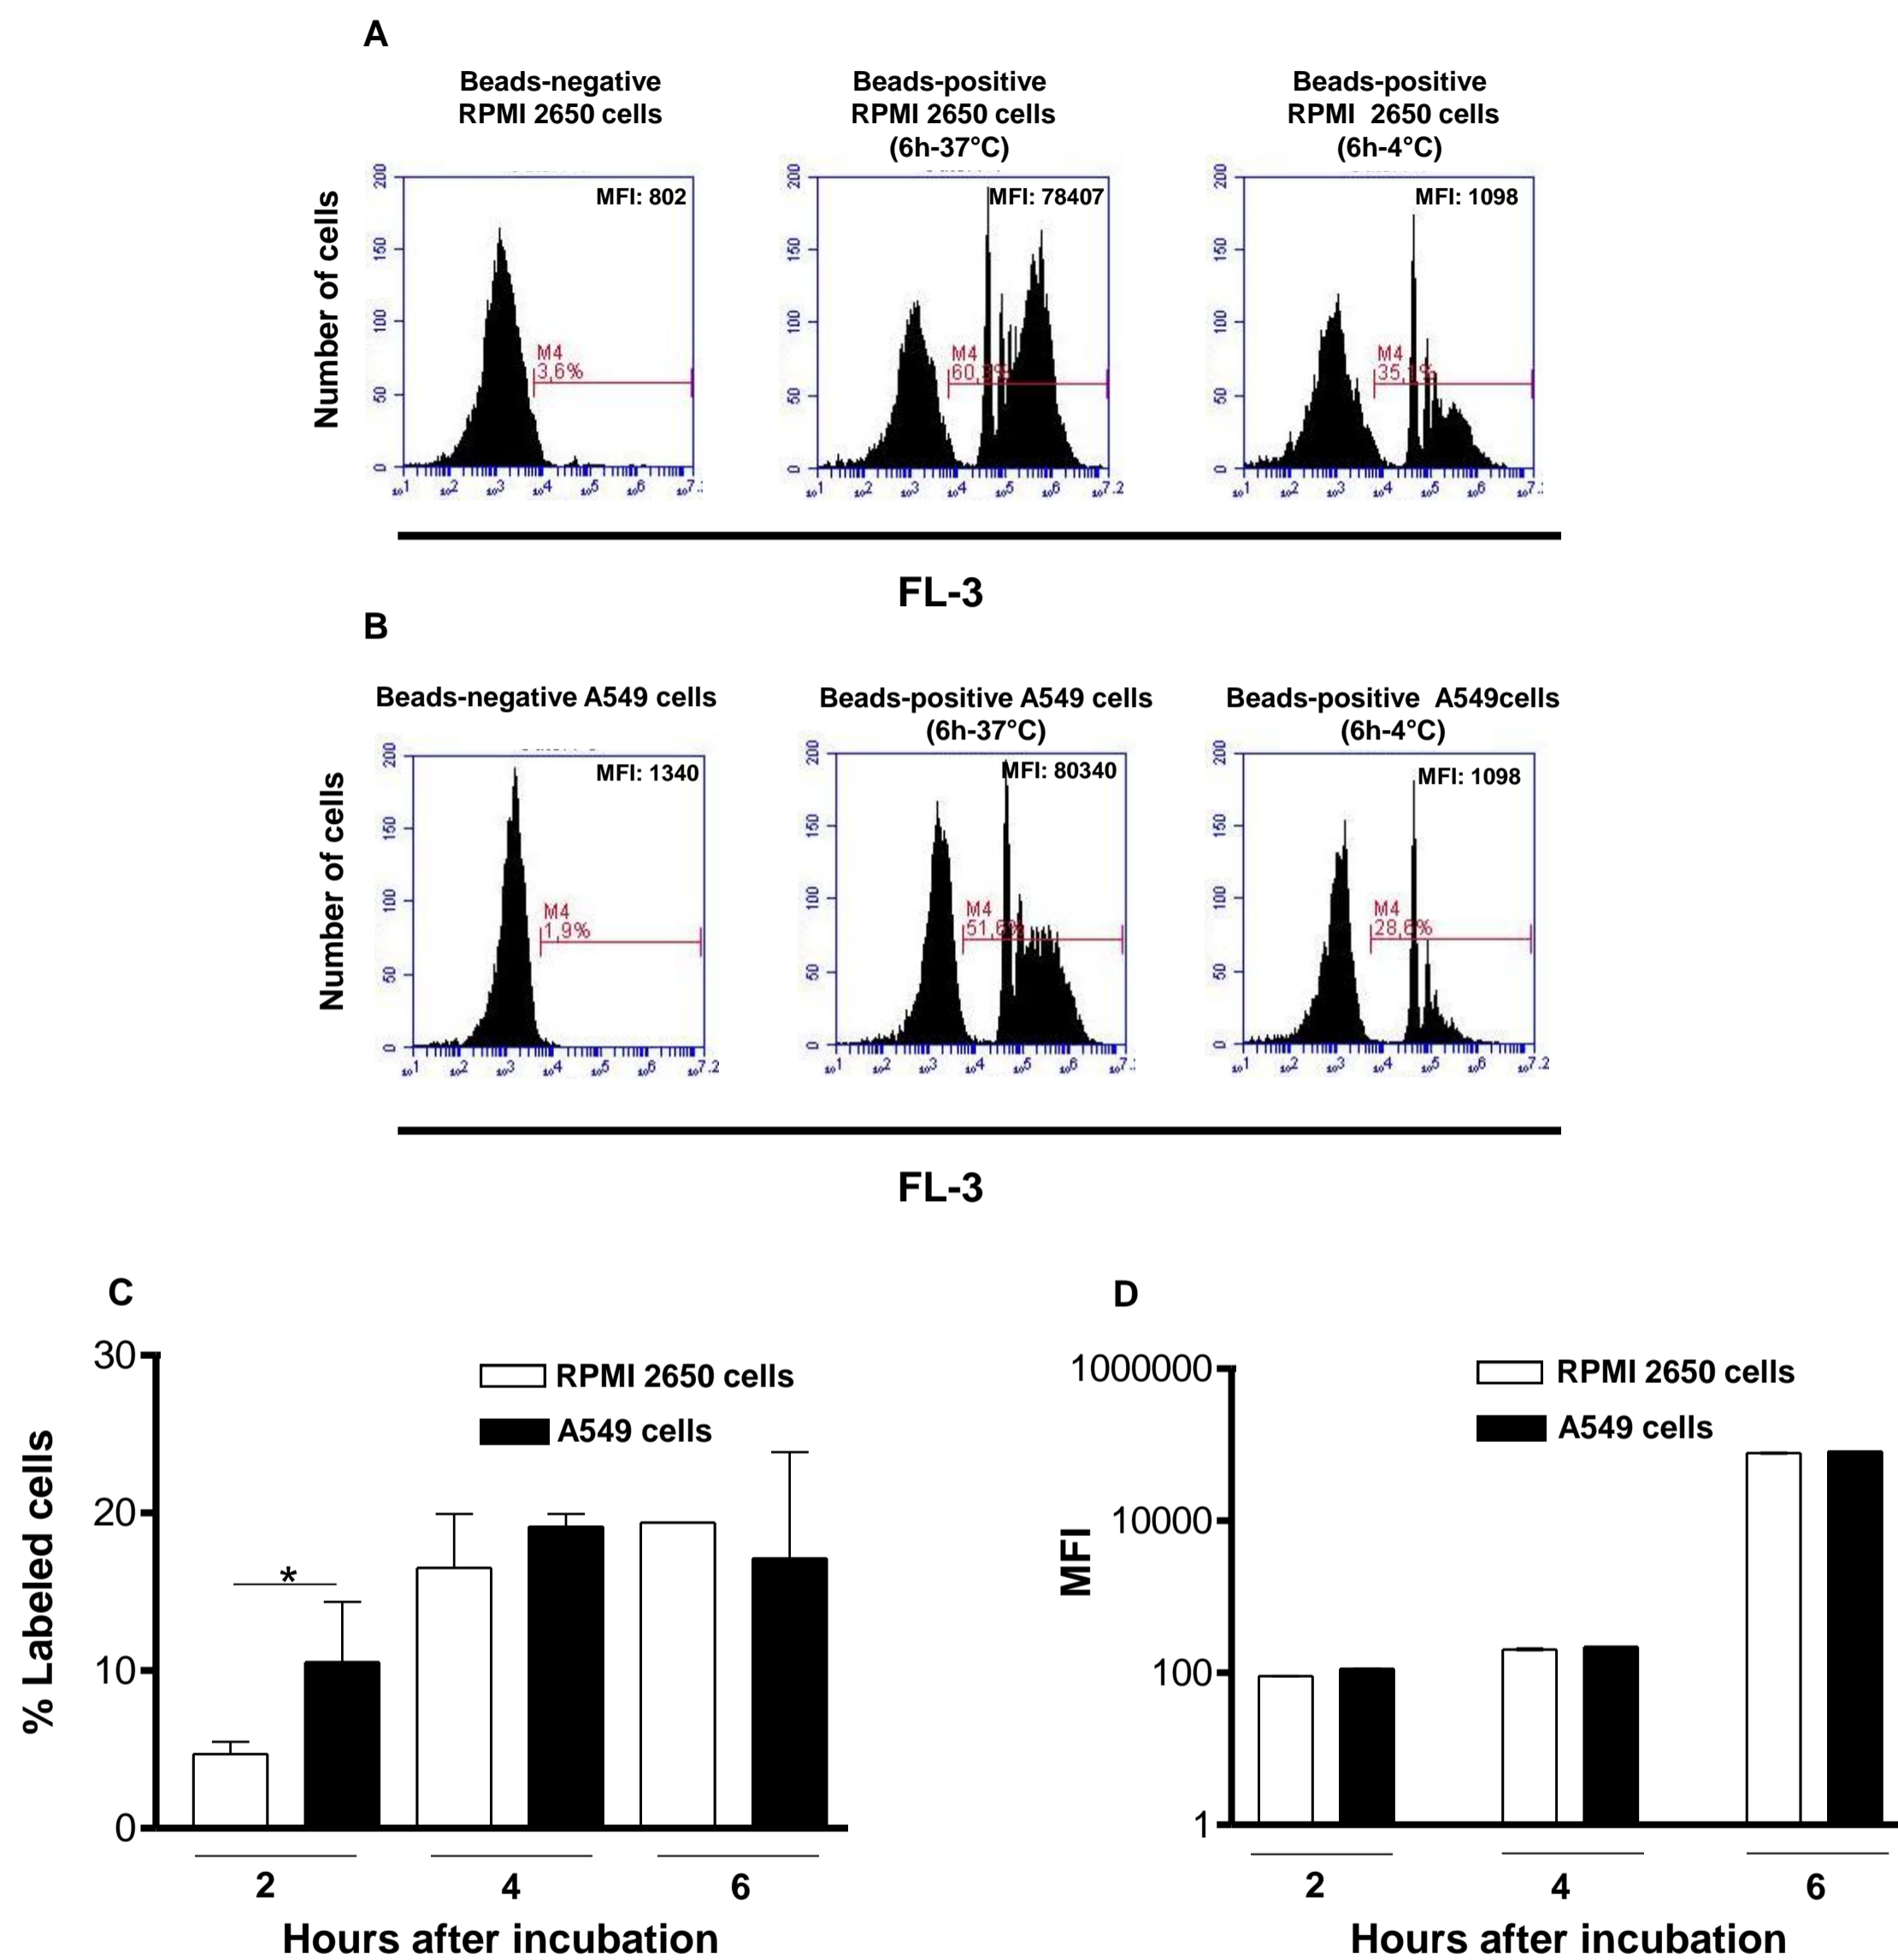

**Supplementary Figure 1: Nasal and alveolar epithelial cells show a similar capacity to uptake inert particles.** Monolayers of epithelial cells were incubated with fluorescent beads at 37°C or at 4°C at different time points and detached and analyzed by flow cytometry. (A, B) Representative histograms showing the positive RPMI 2650 (A) and A549 (B) cells after 6 h of incubation with fluorescent beads at 37°C or at 4°C. (C) The percentage of cells with internalized beads was determined, as follows: % cells with internalized beads = bead-positive cells (37°C) – bead-positive cells (4°C). (D) Median fluorescence intensity (MFI) of cells with internalized beads was calculated, as follows: MFI of cells with internalized beads = MFI (37°C) – MFI (4°C). The data represent the mean values  $\pm$  SD of two experiments performed in duplicate. \*  $P < 0.05$  was considered statistically significant.

**TABLE S1: Cell surface proteins simultaneously identified in crude and NaOH-treated *M. leprae***

| Leproma(ID)* | Gene          | Protein Description                                    | FC* | Subcellular fraction** | Coverage (%)                         | <i>M.tb.</i> H37Rv (ortholog) |
|--------------|---------------|--------------------------------------------------------|-----|------------------------|--------------------------------------|-------------------------------|
| ML0072c      | <i>Soda</i>   | Probable superoxide dismutase SodA                     | 0   | Cyt./Memb./Cw          | 18.8 <sup>a</sup> /19.3 <sup>b</sup> | Rv3846                        |
| ML0317       | <i>groEL2</i> | Heat shock protein Hsp65 family                        | 0   | Cyt./Memb./Cw          | 51.6 <sup>a</sup> /54.9 <sup>b</sup> | Rv0440                        |
| ML0380       | <i>groES</i>  | 10 kDa chaperonin GroEs                                | 0   | Cyt./Memb.             | 73 <sup>a</sup> /58 <sup>b</sup>     | Rv3418c                       |
| ML0381       | <i>groEL1</i> | 60 kDa chaperonin 1 GroEL1                             | 0   | Cyt./Memb.             | 25.5 <sup>a</sup> /53.6 <sup>b</sup> | Rv3417                        |
| ML1623       | <i>htpG</i>   | Heat shock protein Hsp90 family                        | 0   | Cw                     | 9.9 <sup>a</sup> /28.4 <sup>b</sup>  | Rv2299c                       |
| ML1795       | <i>hsp18</i>  | Antigen 18kDa Hsp18                                    | 0   | Cyt./Memb./Cw          | 37.8 <sup>a</sup> /25.7 <sup>b</sup> | -                             |
| ML2042       | <i>ahpC</i>   | Alkyl hidroperoxide reductase                          | 0   | Cyt./Memb.             | 51.8 <sup>a</sup> /73.3 <sup>b</sup> | Rv2428                        |
| ML2254       | <i>otsA</i>   | Probable trehalose phosphate synthase                  | 0   | N.d.                   | 13.7 <sup>a</sup> /6.8 <sup>b</sup>  | Rv3490                        |
| ML2490c      | <i>clpB</i>   | Heat Shock protein                                     | 0   | Cw                     | 6.4 <sup>a</sup> /13.9 <sup>b</sup>  | Rv0384c                       |
| ML2496c      | <i>dnaK</i>   | Probable chaperone protein DnaK                        | 0   | Cyt./Memb.             | 24.8 <sup>a</sup> /41.6 <sup>b</sup> | Rv0350                        |
| ML0101       | <i>pks13</i>  | Polyketide synthase                                    | 1   | N.d.                   | 16.4 <sup>a</sup> /3.1 <sup>b</sup>  | Rv3800c                       |
| ML0138c      | <i>fadD28</i> | Probable fatty-acid-CoA synthetase                     | 1   | Memb./Cw               | 20.3 <sup>a</sup> /21.6 <sup>b</sup> | Rv2941                        |
| ML0139       | <i>Mas</i>    | Mycocerosic acid synthase                              | 1   | Memb. /Cw              | 13.4 <sup>a</sup> /11.2 <sup>b</sup> | Rv2940c                       |
| ML0660c      | <i>fadE23</i> | Probable acyl-CoA dehydrogenase                        | 1   | N.d.                   | 12.4 <sup>a</sup> /10.8 <sup>b</sup> | Rv3140                        |
| ML0737       | <i>fadE25</i> | Probable acyl-CoA dehydrogenase                        | 1   | N.d.                   | 6.7 <sup>a</sup> /6.7 <sup>b</sup>   | Rv3274c                       |
| ML0887c      | <i>fadD15</i> | Probable long-chain-fatty-acid-CoA ligase              | 1   | N.d.                   | 10.3 <sup>a</sup> /10.5 <sup>b</sup> | Rv2187                        |
| ML1229       | <i>pks4</i>   | Polyketide beta-ketoacyl synthase                      | 1   | Cw                     | 2.2 <sup>a</sup> /3.1 <sup>b</sup>   | Rv1180                        |
| ML1654       | <i>acpM</i>   | Involved in meromycolate extension                     | 1   | Cyt.                   | 42.6 <sup>a</sup> /33.9 <sup>b</sup> | Rv2244                        |
| ML2028       | <i>fbpB</i>   | Secreted antigen 85B                                   | 1   | Cyt./Memb./Cw          | 14.1 <sup>a</sup> /10.7 <sup>b</sup> | Rv1886c                       |
| ML2161c      | <i>fadB</i>   | Probable fatty oxidation                               | 1   | Cyt./Memb.             | 25.2 <sup>a</sup> /46.2 <sup>b</sup> | Rv0860                        |
| ML2162c      | <i>fadA</i>   | Acyl -CoA Thiolase                                     | 1   | Memb.                  | 11.2 <sup>a</sup> /45.9 <sup>b</sup> | Rv0859                        |
| ML2353c      | <i>ppsE</i>   | Probable polyketide beta-ketoacyl synthase             | 1   | Memb./Cw               | 16.4 <sup>a</sup> /8.1 <sup>b</sup>  | Rv2935                        |
| ML2354c      | <i>ppsD</i>   | Phenolphthiocerol synthesis type-I polyketide synthase | 1   | N.d.                   | 2 <sup>a</sup> /22.6 <sup>b</sup>    | Rv2934                        |
| ML2402       | <i>echA8</i>  | Probable enoyl-coa hydratase                           | 1   | Cw.                    | 10.1 <sup>a</sup> /22.6 <sup>b</sup> | Rv1070c                       |
| ML2426       | <i>cmaA2</i>  | Cyclopropane-fatty-acyl-phospholipid synthase          | 1   | N.d.                   | 22.1 <sup>a</sup> /36 <sup>b</sup>   | Rv0503c                       |
| ML2461c      | <i>fadB2</i>  | Probable 3-hydroxybutyryl-coa dehydrogenase            | 1   | Memb.                  | 12.5 <sup>a</sup> /47.7 <sup>b</sup> | Rv0468                        |
| ML2546c      | <i>fadD2</i>  | Probable fatty-acid-coA ligase                         | 1   | N.d.                   | 10.3 <sup>a</sup> /9.5 <sup>b</sup>  | Rv0270                        |
| ML2563       | <i>fadE5</i>  | Probable acyl-CoA dehydrogenase                        | 1   | Cyt./Memb.             | 12.4 <sup>a</sup> /16.2 <sup>b</sup> | Rv0244c                       |
| ML2565       | <i>fabG4</i>  | Oxoacyl-reductase                                      | 1   | Memb./Cw               | 19.2 <sup>a</sup> /47.4 <sup>b</sup> | Rv0242c                       |

**TABLE S1: (continued)**

| Leproma(ID)* | Gene           | Protein Description                       | FC* | Subcellular fraction** | Coverage (%)                         | <i>M.tb.</i> H37Rv (ortholog) |
|--------------|----------------|-------------------------------------------|-----|------------------------|--------------------------------------|-------------------------------|
| ML0778       | <i>mI0778</i>  | Conserved hypothetical protein            | 2   | N.d.                   | 10.5 <sup>a</sup> /25.3 <sup>b</sup> | Rv3241c                       |
| ML0854       | <i>gpsI</i>    | RNA degradation                           | 2   | Memb..Cw               | 10.3 <sup>a</sup> /18.6 <sup>b</sup> | Rv2783c                       |
| ML1014c      | <i>sigB</i>    | Sigma factor from RNA polymerase          | 2   | N.d.                   | 7.8 <sup>a</sup> /6.0 <sup>b</sup>   | Rv2710                        |
| ML1132       | <i>rho</i>     | Probable transcription termination factor | 2   | N.d.                   | 3.9 <sup>a</sup> /5.8 <sup>b</sup>   | Rv1297                        |
| ML1382       | <i>rpsA</i>    | Probable ribosomal protein                | 2   | Cyt./Memb.             | 5.6 <sup>a</sup> /8.5 <sup>b</sup>   | Rv1630                        |
| ML1394       | <i>infC</i>    | Initiation factor-3                       | 2   | N.d.                   | 18.3 <sup>a</sup> /43.1 <sup>b</sup> | Rv1641                        |
| ML1597c      | <i>tsf</i>     | Elongation factor                         | 2   | N.d.                   | 14.1 <sup>a</sup> /24.3 <sup>b</sup> | Rv2889c                       |
| ML1598c      | <i>rpsB</i>    | 30s ribosomal protein                     | 2   | Memb.                  | 20.6 <sup>a</sup> /18.4 <sup>b</sup> | Rv2890c                       |
| ML1683c      | <i>hupB</i>    | Probable DNA-binding protein              | 2   | Memb./Cw               | 14 <sup>a</sup> /39 <sup>b</sup>     | Rv2986c                       |
| ML1877c      | <i>tuf</i>     | Iron-regulated elongation factor          | 2   | Cyt./Memb./Cw          | 36.9 <sup>a</sup> /38.9 <sup>b</sup> | Rv0685                        |
| ML1878c      | <i>fusA1</i>   | Probable elongation factor                | 2   | N.d.                   | 5.7 <sup>a</sup> /20.8 <sup>b</sup>  | Rv0684                        |
| ML1890c      | <i>rpoC</i>    | RNA polymerase                            | 2   | Cyt./Memb./Cw          | 19.5 <sup>a</sup> /18.5 <sup>b</sup> | Rv0668                        |
| ML1891c      | <i>rpoB</i>    | RNA polymerase                            | 2   | Cyt./Memb./Cw          | 11.5 <sup>a</sup> /30.1 <sup>b</sup> | Rv0667                        |
| ML1905c      | <i>rplK</i>    | Probable 50s ribosomal protein            | 2   | N.d.                   | 16.9 <sup>a</sup> /31 <sup>b</sup>   | Rv0640                        |
| ML1906c      | <i>nusG</i>    | Probable transcription antitermination    | 2   | Cyt.                   | 16.2 <sup>a</sup> /26.3 <sup>b</sup> | Rv0639                        |
| ML1957c      | <i>rpoA</i>    | Putative RNA polymerase                   | 2   | Memb.                  | 35.2 <sup>a</sup> /54.2 <sup>b</sup> | Rv3457c                       |
| ML1958c      | <i>rpsD</i>    | 30s ribosomal protein                     | 2   | Cw                     | 39.3 <sup>a</sup> /13.4 <sup>b</sup> | Rv3458c                       |
| ML0235       | <i>clpC</i>    | Probable ATP-dependent Clp protease       | 3   | N.d.                   | 4.5 <sup>a</sup> /17.6 <sup>b</sup>  | Rv3596c                       |
| ML0644       | <i>mI0644</i>  | Probable conserved transmembrane protein  | 3   | Memb./Cw               | 24.2 <sup>a</sup> /42.7 <sup>b</sup> | Rv3193c                       |
| ML0841       | <i>mmpl</i>    | Major Memb. protein                       | 3   | Memb.                  | 38.4 <sup>a</sup> /42.7 <sup>b</sup> | -                             |
| ML0922       | <i>wag31</i>   | unknown                                   | 3   | N.d.                   | 15.4 <sup>a</sup> /11.7 <sup>b</sup> | Rv2145c                       |
| ML1839c      | <i>sppa</i>    | Possible protease                         | 3   | Memb.                  | 16.4 <sup>a</sup> /30.7 <sup>b</sup> | Rv0724                        |
| ML1892c      | <i>mkl</i>     | Active transport of ribonucleotide        | 3   | Nd                     | 13.3 <sup>a</sup> /13 <sup>b</sup>   | Rv0655                        |
| ML2489c      | <i>mI2489c</i> | Unknown                                   | 3   | Nd                     | 13.3 <sup>a</sup> /8.4 <sup>b</sup>  | Rv0383c                       |
| ML0127       | <i>mI0127</i>  | Possible methyltransferase                | 7   | Memb./Cw               | 21 <sup>a</sup> /23.6 <sup>b</sup>   | Rv2959c                       |
| ML0130c      | <i>mI0130</i>  | Probable methyltransferase                | 7   | Memb.                  | 28.1 <sup>a</sup> / 8.9 <sup>b</sup> | Rv2952                        |
| ML0131       | <i>mI0131</i>  | Possible oxidoreductase                   | 7   | Memb.                  | 27.5 <sup>a</sup> /51.6 <sup>b</sup> | Rv2951c                       |
| ML0161       | <i>purH</i>    | Purine biosynthesis                       | 7   | Memb.                  | 4 <sup>a</sup> /11.6 <sup>b</sup>    | Rv0957                        |
| ML0183       | <i>moeA1</i>   | Probable molybdopterin biosynthesis       | 7   | Cw.                    | 8 <sup>a</sup> /7.3 <sup>b</sup>     | Rv0994                        |

**TABLE S1: (continued)**

| Leproma(ID)* | Gene           | Protein Description                               | FC* | Subcellular fraction** | Coverage (%)                         | <i>M.tb.</i> H37Rv (ortholog) |
|--------------|----------------|---------------------------------------------------|-----|------------------------|--------------------------------------|-------------------------------|
| ML0315c      | <i>ml0315c</i> | Oxidoreductase                                    | 7   | Cyt./Memb.             | 29.6 <sup>a</sup> /51.6 <sup>b</sup> | Rv0068                        |
| ML0387       | <i>guaB2</i>   | Inosine-5'-monophosphate dehydrogenase            | 7   | N.d.                   | 6.2 <sup>a</sup> /13.2 <sup>b</sup>  | Rv3411c                       |
| ML0418       | <i>ml0418</i>  | Possible oxidoreductase                           | 7   | Cw                     | 11 <sup>a</sup> /22.4 <sup>b</sup>   | Rv3368c                       |
| ML0485c      | <i>gabT</i>    | Probable 4-aminobutyrate aminotransferase         | 7   | Cw                     | 6.7 <sup>a</sup> /28.9 <sup>b</sup>  | Rv2589                        |
| ML0544       | <i>metK</i>    | S-adenosylmethionine synthase                     | 7   | Cyt./Memb.             | 14.1 <sup>a</sup> /8.7 <sup>b</sup>  | Rv1392                        |
| ML0570       | <i>gap</i>     | Probable glyceraldehyde 3-phosphate dehydrogenase | 7   | Memb.                  | 10.9 <sup>a</sup> /14.7 <sup>b</sup> | Rv1436                        |
| ML0578       | <i>ppc</i>     | Phosphoenolpyruvate carboxylase                   | 7   | N.d.                   | 7.4 <sup>a</sup> /7.4 <sup>b</sup>   | -                             |
| ML0582c      | <i>tal</i>     | Transaldolase                                     | 7   | N.d.                   | 10.1 <sup>a</sup> /8.3 <sup>b</sup>  | Rv1448c                       |
| ML0583c      | <i>tkt</i>     | Probable transketolase                            | 7   | N.d.                   | 6.4 <sup>a</sup> /11.2 <sup>b</sup>  | Rv1449c                       |
| ML0674       | <i>folD</i>    | Involved in purine biosynthesis                   | 7   | Cyt.                   | 9.6 <sup>a</sup> /5.3 <sup>b</sup>   | Rv3356c                       |
| ML0697c      | <i>sdhA</i>    | Succinate dehydrogenase                           | 7   | N.d.                   | 6.7 <sup>a</sup> / 14.7 <sup>b</sup> | Rv3318                        |
| ML0771       | <i>sahH</i>    | Putative S-adenosyl-L-homocysteine hydrolase      | 7   | Cyt.                   | 8.7 <sup>a</sup> /32.3 <sup>b</sup>  | Rv3248c                       |
| ML0842       | <i>csd1</i>    | Probable cysteine desulfurase                     | 7   | Memb.                  | 5.6 <sup>a</sup> /12.1 <sup>b</sup>  | -                             |
| ML0861c      | <i>sucB</i>    | Dihydrolipoamide succinyltransferase              | 7   | Cyt.                   | 13.6 <sup>a</sup> /12.5 <sup>b</sup> | Rv2215                        |
| ML0873       | <i>adk</i>     | Probable adenosine kinase                         | 7   | Cyt.                   | 15.1 <sup>a</sup> /16.7 <sup>b</sup> | Rv2202c                       |
| ML0925       | <i>glnA</i>    | Glutamine synthetase                              | 7   | Memb.                  | 2.9 <sup>a</sup> /18 <sup>b</sup>    | Rv2220                        |
| ML0961c      | <i>metE</i>    | Probable methyltransferase                        | 7   | Cyt./Cw                | 7.8 <sup>a</sup> /23.9 <sup>b</sup>  | Rv1133c                       |
| ML1091       | <i>mdh</i>     | Malate dehydrogenase                              | 7   | Cyt.                   | 17.6 <sup>a</sup> /16.7 <sup>b</sup> | Rv1240                        |
| ML1095c      | <i>sucA</i>    | 2-oxoglutarate dehydrogenase                      | 7   | Memb.                  | 6.3 <sup>a</sup> /5.5 <sup>b</sup>   | Rv1248c                       |
| ML1129       | <i>thrA</i>    | Homoserine dehydrogenase                          | 7   | Memb.                  | 7 <sup>a</sup> /7 <sup>b</sup>       | Rv1294                        |
| ML1143       | <i>atpA</i>    | Probable atp synthase alpha chain                 | 7   | Cyt.                   | 7.5 <sup>a</sup> /19.4 <sup>b</sup>  | Rv1308                        |
| ML1144       | <i>atpG</i>    | ATP synthase                                      | 7   | Memb./Cw               | 16.1 <sup>a</sup> /20.5 <sup>b</sup> | Rv1309                        |
| ML1145       | <i>atpD</i>    | ATP synthase                                      | 7   | Cyt./ Memb.            | 12.6 <sup>a</sup> /48 <sup>b</sup>   | Rv1310                        |
| ML1159       | <i>ml1159</i>  | Thioredoxin                                       | 7   | N.d.                   | 11a/48.5b                            | Rv1324                        |
| ML1323       | <i>prcA</i>    | Proteasome                                        | 7   | Memb.                  | 18.5 <sup>a</sup> /29.8 <sup>b</sup> | Rv2109c                       |
| ML1412       | <i>argG</i>    | Probable Argininosuccinate synthase               | 7   | N.d.                   | 6.8 <sup>a</sup> /9.5 <sup>b</sup>   | Rv1658                        |
| ML1458c      | <i>proA</i>    | Phosphate reductase protein                       | 7   | N.d.                   | 8.3 <sup>a</sup> /19.1 <sup>b</sup>  | Rv2427c                       |
| ML1480c      | <i>clpP1</i>   | ATP-dependent Clp protease                        | 7   | Cyt.                   | 15 <sup>a</sup> /37 <sup>b</sup>     | Rv2461c                       |
| ML1692c      | <i>serA1</i>   | phosphoglycerate dehydrogenase                    | 7   | N.d.                   | 10.8 <sup>a</sup> /6.6 <sup>b</sup>  | Rv2996c                       |
| ML1694c      | <i>ilvC</i>    | Probable ketol-acid reductoisomerase              | 7   | Cyt.                   | 12.3 <sup>a</sup> /31.2 <sup>b</sup> | Rv3001c                       |
| ML1711c      | <i>fixB</i>    | Probable electron transfer flavoprotein           | 7   | Cyt./Memb.             | 15 <sup>a</sup> /17 <sup>b</sup>     | Rv3028c                       |

**TABLE S1: (continued)**

| Leproma(ID)* | Gene    | Protein Description                                                   | FC* | Subcellular fraction** | Coverage (%)                         | <i>M.tb.</i> H37Rv (ortholog) |
|--------------|---------|-----------------------------------------------------------------------|-----|------------------------|--------------------------------------|-------------------------------|
| ML1751c      | moeY    | Possible molybdopterin biosynthesis protein                           | 7   | N.d.                   | 12.6 <sup>a</sup> /10.8 <sup>b</sup> | Rv1355c                       |
| ML1794       | ml1794  | Probable amidotransferase                                             | 7   | N.d.                   | 7 <sup>a</sup> /9.7 <sup>b</sup>     | Rv2294                        |
| ML1814       | acn     | Aconitate hydratase                                                   | 7   | N.d.                   | 6.1 <sup>a</sup> /16.5 <sup>b</sup>  | Rv1475c                       |
| ML1947       | fum     | Fumarase                                                              | 7   | N.d.                   | 10.1 <sup>a</sup> /19.6 <sup>b</sup> | Rv1098c                       |
| ML1953c      | glyA1   | Serine hydroxymethyltransferase                                       | 7   | N.d.                   | 4.5 <sup>a</sup> /26.1 <sup>b</sup>  | Rv1093                        |
| ML1985c      | aceA    | Isocitrate lyase                                                      | 7   | Memb./Cw               | 5 <sup>a</sup> /13.3 <sup>b</sup>    | Rv1916                        |
| ML2046       | lldD2   | L-lactate dehydrogenase                                               | 7   | Memb.                  | 17.6 <sup>a</sup> /7.7 <sup>b</sup>  | Rv1872c                       |
| ML2069       | glcB    | Malate synthase                                                       | 7   | Cyt./Cw                | 10.1 <sup>a</sup> /23.9 <sup>b</sup> | Rv1837c                       |
| ML2130c      | gltA2   | Probable citrate synthase                                             | 7   | Cyt./Memb.             | 11.6 <sup>a</sup> /33.4 <sup>b</sup> | Rv0896                        |
| ML2263c      | menB    | Probable naphthoate synthase                                          | 7   | N.d.                   | 11.7 <sup>a</sup> /18.7 <sup>b</sup> | Rv0548c                       |
| ML2277       | grcC1   | Probable polyprenyl-diphosphate synthase                              | 7   | N.d.                   | 12.4 <sup>a</sup> /17.3 <sup>b</sup> | Rv0562                        |
| ML2502       | aspC    | Probable aspartate aminotransferase                                   | 7   | N.d.                   | 4.1 <sup>a</sup> /6.4 <sup>b</sup>   | Rv0337c                       |
| ML2608c      | ilvD    | Involved in valine and isoleucine biosynthesis                        | 7   | N.d.                   | 6.9 <sup>a</sup> /8.5 <sup>b</sup>   | Rv0189c                       |
| ML2634c      | pntB    | Transhydrogenase                                                      | 7   | N.d.                   | 6.8 <sup>a</sup> /7.2 <sup>b</sup>   | Rv0157                        |
| ML2636c      | pntAa   | Transhydrogenase                                                      | 7   | N.d.                   | 6.8 <sup>a</sup> /17.2 <sup>b</sup>  | Rv0155                        |
| ML2639c      | ml2639c | Probable aldehyde dehydrogenase                                       | 7   | N.d.                   | 10.6 <sup>a</sup> /7.4 <sup>b</sup>  | Rv0147                        |
| ML2672c      | icd2    | Probable isocitrate dehydrogenase                                     | 7   | Memb.                  | 9.7 <sup>a</sup> /10.7 <sup>b</sup>  | Rv0066c                       |
| ML0773       | mtrA    | Transcriptional activator, part of a two component regulatory system. | 9   | Memb./Cw               | 12.4 <sup>a</sup> /24.9 <sup>b</sup> | Rv3246c                       |
| ML1810c      | moxR1   | Transcriptional regulatory protein                                    | 9   | Memb                   | 18.6 <sup>a</sup> /34.2 <sup>b</sup> | Rv1479                        |
| ML0055c      | ml0055c | Conserved hypothetical protein                                        | 10  | N.d.                   | 4.9 <sup>a</sup> /9.6 <sup>b</sup>   | Rv3868                        |
| ML0129c      | ml0129  | Conserved hypothetical protein                                        | 10  | Memb.                  | 38.5 <sup>a</sup> /31.6 <sup>b</sup> | Rv2953                        |
| ML0860c      | ml0860c | Conserved hypothetical protein                                        | 10  | N.d.                   | 10.1 <sup>a</sup> /26.4 <sup>b</sup> | Rv2216                        |
| ML1444       | ml1444  | Conserved hypothetical protein                                        | 10  | Memb.                  | 10.3 <sup>a</sup> /13.8 <sup>b</sup> | Rv2054                        |
| ML1898       | ml1898  | Conserved hypothetical protein                                        | 10  | N.d.                   | 9.6 <sup>a</sup> /6.7 <sup>b</sup>   | Rv0647c                       |
| ML2346c      | ml2346  | Conserved hypothetical protein                                        | 10  | N.d.                   | 16.3 <sup>a</sup> /11.3 <sup>b</sup> | -                             |
| ML2465       | ML2465  | Conserved hypothetical protein                                        | 10  | Memb.                  | 27.7 <sup>a</sup> /27.1 <sup>b</sup> | Rv0464c                       |

N.d- Not determined

The confidence interval was of 100% to all identified proteins.

\*The leproma identification (ID) and the functional category (FC) were obtained from Leproma ( <http://genolist.pasteur.fr/Leproma/>).

\*\*The subcellular localization was obtained from data previously described in the literature (1; 2; 3; 4; 5 and 6). The abbreviations Cyt, Cw and Memb mean, respectively, cytosolic, cell wall and membrane fractions.

<sup>a</sup>Peptide sequence coverage (%) obtained in NaOH-treated *M. leprae*.

<sup>b</sup>Peptide sequence coverage (%) obtained in crude *M. leprae*

**TABLE S2: Cell surface-exposed proteins identified only in crude *M. leprae***

| Leproma(ID)* | Gene           | Protein Description                                       | FC* | Subcellular fraction** | Coverage (%) | <i>M.tb.</i> H37Rv (ortholog) |
|--------------|----------------|-----------------------------------------------------------|-----|------------------------|--------------|-------------------------------|
| ML0625       | <i>dnaJ2</i>   | Probable chaperone protein DnaJ2                          | 0   | N.d.                   | 6.3          | Rv2373c                       |
| ML0862       | <i>ephD</i>    | Putative oxidoreductase                                   | 0   | Memb.                  | 5.9          | Rv2214c                       |
| ML2015c      | <i>cinA</i>    | Probable cinA-like protein                                | 0   | N.d.                   | 12.9         | Rv1901c                       |
| ML1158       | <i>fadA4</i>   | Probable acetyl-coa acetyltransferase                     | 1   | N.d.                   | 9.2          | Rv1323                        |
| ML2185       | <i>desA1</i>   | Putative acyl-desaturase                                  | 1   | N.d.                   | 14.2         | Rv0824c                       |
| ML2498       | <i>ml2498</i>  | Possible enoyl-Coa hydratase                              | 1   | N.d.                   | 18.3         | -                             |
| ML0002       | <i>dnaN</i>    | Probable DNA polymerase                                   | 2   | N.d.                   | 8.8          | Rv0002                        |
| ML0155       | <i>sucC</i>    | Succinyl-CoA-synthetase                                   | 2   | N.d.                   | 9.7          | Rv0951                        |
| ML0826       | <i>glyS</i>    | Probable t-rna synthetase                                 | 2   | Memb.                  | 17.5         | Rv2357c                       |
| ML1174       | <i>rphA</i>    | Probable ribonuclease                                     | 2   | Cyt.                   | 15.8         | Rv1340                        |
| ML1553       | <i>proS</i>    | Probable prolyl tRNA synthetase                           | 2   | Memb./Cw               | 12.1         | -                             |
| ML1556c      | <i>infB</i>    | Translation initiation factor                             | 2   | N.d.                   | 9.2          | Rv2839c                       |
| ML1688c      | <i>gltS</i>    | Probable glutamyl-trna synthetase                         | 2   | N.d.                   | 9.0          | Rv2992c                       |
| ML1700c      | <i>gatB</i>    | Putative glutamyl-tRNA synthetase                         | 2   | N.d.                   | 5.78         | Rv3009c                       |
| ML1731c      | <i>nrdF</i>    | Involved in the dna replication pathway                   | 2   | N.d.                   | 14.8         | Rv3048c                       |
| ML1860c      | <i>rplB</i>    | Probable 50s ribosomal protein                            | 2   | Memb.                  | 21.8         | Rv0704                        |
| ML2697c      | <i>pcnA</i>    | Putative polymerase                                       | 2   | N.d.                   | 9.5          | Rv3907c                       |
| ML1316       | <i>mpa</i>     | Probable proteasome                                       | 3   | N.d.                   | 14.8         | Rv2115c                       |
| ML1367       | <i>ml1367</i>  | Putative initiation inhibitor protein                     | 3   | N.d.                   | 13.8         | Rv1708                        |
| ML1481c      | <i>tig</i>     | Trigger factor protein                                    | 3   | N.d.                   | 15.4         | Rv2462c                       |
| ML1622c      | <i>ffh</i>     | Export of extra-cytoplasmic proteins                      | 3   | Memb.                  | 9.0          | Rv2916c                       |
| ML1633c      | <i>ml1633c</i> | Exported protease                                         | 3   | Memb.                  | 7.9          | Rv2224c                       |
| ML2082c      | <i>secA2</i>   | Putative ATPase                                           | 3   | N.d.                   | 7.1          | Rv1821                        |
| ML2188       | <i>phoY2</i>   | Probable phosphate transport system                       | 3   | N.d.                   | 25.2         | Rv0821c                       |
| ML2352c      | <i>drrA</i>    | Antibiotic resistance                                     | 3   | N.d.                   | 21.5         | Rv2936                        |
| ML2706c      | <i>parB</i>    | Probable chromosome partitioning protein                  | 3   | N.d.                   | 7.8          | Rv3917c                       |
| ML0210c      | <i>ppa</i>     | Inorganic pyrophosphate                                   | 7   | Memb.                  | 21.6         | Rv3628                        |
| ML0255       | <i>eno</i>     | Probable enolase                                          | 7   | Memb.                  | 9.3          | Rv1023                        |
| ML0269c      | <i>fdg1</i>    | Probable F420-dependent glucose-6-phosphate dehydrogenase | 7   | Cyt.                   | 25.9         | Rv0407                        |
| ML0286c      | <i>fba</i>     | Probable fructose biphosphate aldolase                    | 7   | Cyt.                   | 20           | Rv0363c                       |

**TABLE S2: (continued)**

| Leproma(ID)* | Gene           | Protein Description                             | FC* | Subcellular fraction** | Coverage (%) | <i>M.tb.</i> H37Rv (ortholog) |
|--------------|----------------|-------------------------------------------------|-----|------------------------|--------------|-------------------------------|
| ML0348       | <i>ml0348</i>  | Possible coenzyme F420-dependent oxidoreductase | 7   | Cyt./Memb.             | 26           | Rv3520c                       |
| ML0551c      | <i>ml0551c</i> | Methyltransferase                               | 7   | Cyt.                   | 14.6         | Rv1405c                       |
| ML0572       | <i>tpi</i>     | Possible Triosephospate                         | 7   | Cyt.                   | 22.2         | Rv1438                        |
| ML0611       | <i>lepA</i>    | GTP binding protein                             | 7   | N.d.                   | 7.6          | Rv2404c                       |
| ML0839c      | <i>cysK</i>    | Probable cysteine synthase                      | 7   | Cyt./Memb              | 19.4         | Rv2334                        |
| ML0866       | <i>ilvE</i>    | Probable branched-chain amino acid transaminase | 7   | N.d.                   | 21.2         | Rv2210c                       |
| ML0875       | <i>ctaC</i>    | Transmemb cytochrome c oxidase                  | 7   | N.d.                   | 13.6         | Rv2200c                       |
| ML0896       | <i>aroG</i>    | Play a role in chorismate biosynthesis          | 7   | N.d.                   | 10.2         | Rv2178c                       |
| ML0996       | <i>dapF</i>    | Diaminopimelate epimerase                       | 7   | N.d.                   | 13.2         | Rv2726c                       |
| ML1023c      | <i>ppgK</i>    | Polyphosphate glucokinase                       | 7   | N.d.                   | 9.9          | Rv2702                        |
| ML1130       | <i>thrC</i>    | Threonine synthase                              | 7   | Cyt.                   | 25.8         | Rv1295                        |
| ML1272       | <i>trpB</i>    | Tryptophan synthase                             | 7   | N.d.                   | 10.6         | Rv1612                        |
| ML1273       | <i>trpA</i>    | Tryptophan synthase                             | 7   | N.d.                   | 18.5         | Rv1613                        |
| ML1310       | <i>hisG</i>    | ATP phosphoribosyltransferase                   | 7   | N.d.                   | 23.7         | Rv2121c                       |
| ML1322       | <i>prcB</i>    | Proteasome                                      | 7   | Memb.                  | 17.2         | Rv2110c                       |
| ML1363       | <i>pyrG</i>    | CTP synthase                                    | 7   | N.d.                   | 8.5          | Rv1699                        |
| ML1479c      | <i>clpP2</i>   | Putative protease                               | 7   | Cw                     | 18.7         | Rv2460c                       |
| ML1532       | <i>ald</i>     | L-alanine dehydrogenase                         | 7   | N.d.                   | 10           | Rv2780                        |
| ML1651       | <i>aceE</i>    | pyruvate dehydrogenase                          | 7   | N.d.                   | 4.2          | Rv2241                        |
| ML1701c      | <i>pfkA</i>    | phosphofructokinase                             | 7   | N.d.                   | 29.2         | Rv3010c                       |
| ML1832c      | <i>kad</i>     | Possible adenylate synthase                     | 7   | Cyt.                   | 18.8         | Rv0733                        |
| ML2038c      | <i>bfrA</i>    | Bacterioferritin                                | 7   | Cyt./Memb.             | 28.9         | Rv1876                        |
| ML2053c      | <i>adhA</i>    | Probable alcohol dehydrogenase                  | 7   | N.d.                   | 19.6         | Rv1862                        |
| ML2059       | <i>ml2059</i>  | Possible oxodoreductase                         | 7   | Cw                     | 30.4         | Rv1856c                       |
| ML2065       | <i>gnd1</i>    | Probable 6-phosphogluconate dehydrogenase       | 7   | N.d.                   | 9.7          | Rv1844c                       |
| ML2136       | <i>serC</i>    | Phosphoserine aminotransferase                  | 7   | N.d.                   | 9.0          | Rv0884c                       |
| ML2167       | <i>pdC</i>     | Indole-3-pyruvate decarboxylase                 | 7   | Cyt.                   | 23.4         | Rv0853c                       |
| ML2226c      | <i>ptrB</i>    | Probable protease                               | 7   | Cw                     | 11.5         | Rv0781/Rv0782                 |
| ML2387       | <i>lpd</i>     | Dihydrolipoamide dehydrogenase                  | 7   | Memb.                  | 27.8         | Rv0462                        |
| ML2394c      | <i>metB</i>    | Methionine biosynthesis                         | 7   | Memb.                  | 18.3         | Rv1079                        |

**TABLE S2: (continued)**

| Leproma(ID)* | Gene           | Protein Description                              | FC* | Subcellular fraction** | Coverage (%) | <i>M.tb.</i> H37Rv (ortholog) |
|--------------|----------------|--------------------------------------------------|-----|------------------------|--------------|-------------------------------|
| ML2396c      | <i>cbs</i>     | Probable cystathionine beta-synthase             | 7   | Cyt.                   | 9.5          | Rv1077                        |
| ML2430c      | <i>proC</i>    | Pyrraline-5-carboxylate reductase                | 7   | Memb./Cw               | 20.1         | Rv0500                        |
| ML2441c      | <i>gpm1</i>    | Phosphoglycerate mutase 1                        | 7   | Cyt.                   | 26.7         | Rv0489                        |
| ML2573       | <i>gabD</i>    | Probable succinate-semialdehyde dehydrogenase    | 7   | Cyt.                   | 21.7         | Rv0234c                       |
| ML2613c      | <i>ml2613</i>  | Zinc metalloprotease                             | 7   | N.d.                   | 8.3          | Rv0198c                       |
| ML2624       | <i>pckA</i>    | Iron regulated phosphoenolpyruvate carboxykinase | 7   | N.d.                   | 9.4          | Rv0211                        |
| ML2703       | <i>trxC</i>    | Thioredoxin                                      | 7   | Cyt.                   | 41.3         | Rv3914                        |
| ML2123       | <i>prrA</i>    | Transcriptional regulatory protein               | 9   | Nd                     | 17.2         | Rv0903c                       |
| ML0564       | <i>ml0564</i>  | Conserved hypothetical protein                   | 10  | Nd                     | 9.7          | Rv1422                        |
| ML0593       | <i>ml0593</i>  | Conserved hypothetical protein                   | 10  | Memb.                  | 4.9          | Rv1461                        |
| ML0594       | <i>ml0594</i>  | Conserved hypothetical protein                   | 10  | Nd                     | 15.1         | Rv1462                        |
| ML0703c      | <i>ml0703</i>  | Conserved hypothetical protein                   | 10  | Memb.                  | 18.7         | Rv3311                        |
| ML0901       | <i>ml0901</i>  | Conserved hypothetical protein                   | 10  | Cw                     | 14.5         | Rv2172c                       |
| ML1041c      | <i>ml1041c</i> | Conserved hypothetical protein                   | 10  | Cw                     | 15.8         | Rv2680                        |
| ML1045       | <i>ml1045</i>  | Conserved hypothetical protein                   | 10  | N.d.                   | 10.8         | Rv2676c                       |
| ML1052c      | <i>ml1052c</i> | Conserved hypothetical protein                   | 10  | N.d.                   | 18.8         | Rv1194c                       |
| ML1149c      | <i>ml1149c</i> | Conserved hypothetical protein                   | 10  | N.d.                   | 18.8         | Rv1314c                       |
| ML1391c      | <i>ml1391</i>  | Conserved hypothetical protein                   | 10  | N.d.                   | 14.7         | Rv1637c                       |
| ML1423c      | <i>ml1423</i>  | Conserved hypothetical protein                   | 10  | Memb.                  | 15.8         | Rv2037c                       |
| ML1540c      | <i>ml1540</i>  | Conserved hypothetical protein                   | 10  | N.d.                   | 18.3         | Rv1794                        |
| ML1661c      | <i>ml1661</i>  | Conserved hypothetical protein                   | 10  | Cw                     | 22.4         | Rv2927c                       |
| ML2020       | <i>ml2020</i>  | Conserved hypothetical protein                   | 10  | Cyt.                   | 20.1         | Rv1896c                       |
| ML2203       | <i>ml2203</i>  | Conserved hypothetical protein                   | 10  | N.d.                   | 13.7         | Rv0811c                       |
| ML2336c      | <i>ml2336</i>  | Conserved hypothetical protein                   | 10  | Cw                     | 7.3          | Rv3722c                       |
| ML2627       | <i>ml2627</i>  | Conserved hypothetical protein                   | 10  | Cw                     | 7.0          | Rv0216                        |

N.d- Not determined

The confidence interval was of 100% to all identified proteins.

\*The leproma identification (ID) and the functional category (FC) were obtained from Leproma ( <http://genolist.pasteur.fr/Leproma/>).

\*\*The subcellular localization was obtained from data previously described in the literature (1;4 and 5). The abbreviations Cyt, Cw and Memb mean, respectively, cytosolic, cell wall and membrane fractions.



**TABLE S3: Cell surface-exposed proteins identified only in NaOH-treated *M. leprae***

| Leproma(ID)* | Gene           | Protein Description                                                             | FC* | Subcellular fraction** | Coverage (%) | <i>M.tb.</i> H37Rv (ortholog) |
|--------------|----------------|---------------------------------------------------------------------------------|-----|------------------------|--------------|-------------------------------|
| ML2589       | <i>mce1A</i>   | MCE family protein                                                              | 0   | N.d.                   | 8.4          | Rv0169                        |
| ML2591       | <i>mce1C</i>   | MCE family protein                                                              | 0   | N.d.                   | 5.2          | Rv0171                        |
| ML0100       | <i>fadD32</i>  | Probable fatty-acid-CoA synthetase                                              | 1   | N.d.                   | 4.9          | Rv3801c                       |
| ML0120c      | <i>echA1</i>   | Possible enoyl-CoA hydratase                                                    | 1   | N.d.                   | 13.7         | Rv3774                        |
| ML0135       | <i>pks1</i>    | Probable polyketide synthase                                                    | 1   | Cw                     | 5.3          | Rv2946c/Rv2947c               |
| ML1191       | <i>fas</i>     | Probable fatty acid synthase                                                    | 1   | Memb./Cw               | 4.9          | Rv2524c                       |
| ML1346       | <i>ml1346</i>  | Possible long-chain acyl-CoA synthase                                           | 1   | N.d.                   | 2.8          | Rv1683                        |
| ML1807c      | <i>fabG1</i>   | Mycolic acid biosynthesis                                                       | 1   | N.d.                   | 9.5          | Rv1483                        |
| ML2355c      | <i>ppsC</i>    | Involved in phenolphthiocerol and phthiocerol Dimycocerosate (DIM) biosynthesis | 1   | Memb./Cw               | 2.2          | Rv2933                        |
| ML2357c      | <i>ppsA</i>    | Phenolphthiocerol synthesis type-i polyketide synthase                          | 1   | N.d.                   | 2.5          | Rv2931                        |
| ML2564c      | <i>fadA2</i>   | Probable acetyl-coA acyltransferase                                             | 1   | N.d.                   | 2.2          | Rv0243                        |
| ML0006       | <i>gyrA</i>    | Probable DNA gyrase                                                             | 2   | N.d.                   | 2.2          | Rv0006                        |
| ML0032       | <i>leuS</i>    | Probable leucyl-tRNA synthetase LeuS                                            | 2   | N.d.                   | 2.5          | Rv0041                        |
| ML0245c      | <i>rplY</i>    | Probable 50S ribosomal protein L25                                              | 2   | N.d.                   | 5.6          | Rv1015c                       |
| ML0364       | <i>rplM</i>    | Probable 50S ribosomal protein L13                                              | 2   | N.d.                   | 20.4         | Rv3443c                       |
| ML1022c      | <i>sigA</i>    | RNA polymerase sigma factor                                                     | 2   | N.d.                   | 4.2          | Rv2703                        |
| ML1352       | <i>tyrS</i>    | Probable Tyrosyl-tRNA synthase TyrS                                             | 2   | N.d.                   | 6.6          | Rv1689                        |
| ML1392       | <i>uvrA</i>    | Probable excinuclease abc                                                       | 2   | N.d.                   | 2.6          | Rv1638                        |
| ML1840c      | <i>rplO</i>    | Probable 50s ribosomal protein l15                                              | 2   | N.d.                   | 21.2         | Rv0723                        |
| ML1842c      | <i>rpsE</i>    | Probable 30s ribosomal protein s5                                               | 2   | Cw                     | 20.3         | Rv0721                        |
| ML1845c      | <i>rpsH</i>    | Probable 30s ribosomal protein s8                                               | 2   | Memb.                  | 25           | Rv0718                        |
| ML1847c      | <i>rplE</i>    | Probable 50s ribosomal protein                                                  | 2   | Memb./Cw               | 38           | Rv0716                        |
| ML1857c      | <i>rpsC</i>    | Probable 30s ribosomal protein s3                                               | 2   | Memb.                  | 21           | Rv0707                        |
| ML1864c      | <i>rpsJ</i>    | 30s ribosomal protein s10                                                       | 2   | N.d.                   | 24.8         | Rv0700                        |
| ML1879c      | <i>rpsG</i>    | 30s ribosomal protein                                                           | 2   | N.d.                   | 48.1         | Rv0683                        |
| ML1895c      | <i>rplL</i>    | Probable 50s ribosomal protein                                                  | 2   | Cyt./Memb              | 16.2         | Rv0652                        |
| ML0093       | <i>glfT</i>    | Bifunctional UDP-galactofuranosyl transferase                                   | 3   | Memb.                  | 4            | Rv3808c                       |
| ML0178c      | <i>mscL</i>    | Possible large-conductance ion mechanosensitive                                 | 3   | N.d.                   | 26.6         | Rv0985c                       |
| ML0201c      | <i>ml0201c</i> | Conserved Transmemb. protein                                                    | 3   | N.d.                   | 3.8          | Rv3645                        |
| ML0487       | <i>secD</i>    | Protein export memb. protein                                                    | 3   | N.d.                   | 4.7          | Rv2587c                       |

**TABLE S3: (continued)**

| Leproma(ID)* | Gene           | Protein Description                                          | FC* | Subcellular fraction** | Coverage (%) | <i>M.tb.</i> H37Rv (ortholog) |
|--------------|----------------|--------------------------------------------------------------|-----|------------------------|--------------|-------------------------------|
| ML0640c      | <i>ml0640c</i> | Probable conserved ATP binding protein                       | 3   | N.d.                   | 14           | Rv3197                        |
| ML0872c      | <i>ml0872c</i> | Conserved memb. protein                                      | 3   | N.d.                   | 11.1         | Rv2203                        |
| ML0914       | <i>murG</i>    | Peptidoglycan synthesis                                      | 3   | N.d.                   | 10.8         | Rv2153c                       |
| ML1096c      | <i>ml1096c</i> | Possible memb. protein                                       | 3   | N.d.                   | 13.4         | Rv1249c                       |
| ML1244       | <i>ml1244</i>  | unknown                                                      | 3   | Nd                     | 6.1          | Rv2484c                       |
| ML1248       | <i>ml1248</i>  | ATP-binding protein ABC transporter                          | 3   | Cw                     | 12.9         | Rv2477c                       |
| ML2228       | <i>ml2228</i>  | Conserved Transmemb. protein                                 | 3   | N.d.                   | 13.6         | Rv0779c                       |
| ML2306       | <i>ml2306</i>  | Probable anion transporter ATPase                            | 3   | N.d.                   | 13.9         | Rv3680                        |
| ML2347       | <i>ml2347</i>  | putative memb. protein                                       | 3   | N.d.                   | 14           | -                             |
| ML2395c      | <i>pra</i>     | unknown                                                      | 3   | N.d.                   | 10.8         | Rv1078                        |
| ML2400c      | <i>ml2400c</i> | Conserved Transmemb. protein                                 | 3   | N.d.                   | 7.3          | Rv1072                        |
| ML2454c      | <i>hbhA</i>    | Hemagglutinin                                                | 3   | Cyt./Memb./Cw          | 14.9         | Rv0475                        |
| ML2535c      | <i>ml2535c</i> | Memb. protein                                                | 3   | N.d.                   | 1.8          | Rv0284                        |
| ML2581       | <i>ml2581</i>  | Probable conserved memb. protein                             | 3   | N.d.                   | 6.5          | Rv0227c                       |
| ML2671       | <i>ctpl</i>    | Probable cation-transporter ATPase1                          | 3   | N.d.                   | 5.2          | Rv0107c                       |
| ML1365       | <i>ml1365</i>  | Probable integrase/recombinase                               | 5   | N.d.                   | 7.6          | Rv1701                        |
| ML0065       | <i>ethA</i>    | Monooxygenase                                                | 7   | Cw                     | 6.9          | Rv3854c                       |
| ML0125       | <i>ml0125</i>  | Glycosyltransferase                                          | 7   | N.d.                   | 8.9          | Rv2962c                       |
| ML0248c      | <i>prsA</i>    | Probable ribose-phosphate pyrophosphokinase                  | 7   | N.d.                   | 10.1         | Rv1017c                       |
| ML0275c      | <i>metZ</i>    | Methionine biosynthesis                                      | 7   | N.d.                   | 6.1          | Rv0391                        |
| ML0458c      | <i>ml0458c</i> | Possible oxidoreductase                                      | 7   | Cyt.                   | 19.2         | -                             |
| ML0666c      | <i>fprA</i>    | Probable NADPH                                               | 7   | N.d.                   | 5.5          | Rv3106                        |
| ML0696c      | <i>sdhB</i>    | Probable succinate dehydrogenase                             | 7   | N.d.                   | 8.3          | Rv3319                        |
| ML0874c      | <i>asnB</i>    | Asparagine synthetase                                        | 7   | N.d.                   | 6.5          | Rv2201                        |
| ML1078       | <i>htrA</i>    | Serine protease                                              | 7   | N.d.                   | 7.9          | Rv1223                        |
| ML1142       | <i>atpH</i>    | ATP synthetase                                               | 7   | Memb.                  | 6.3          | Rv1307                        |
| ML1340c      | <i>ribD</i>    | Possible bifunctional enzyme riboflavin biosynthesis protein | 7   | Cyt.                   | 11.2         | Rv2671                        |
| ML1684c      | <i>leuD</i>    | Leucine biosynthesis                                         | 7   | Cw                     | 13.6         | Rv2987c                       |
| ML2061       | <i>ndh</i>     | Probable nadh dehydrogenase                                  | 7   | N.d.                   | 4.9          | Rv1854c                       |
| ML2088c      | <i>ml2088c</i> | Cytochrome P450c                                             | 7   | Cyt./Memb              | 13.5         | -                             |

**TABLE S3: (continued)**

| Leproma(ID)*   | Gene           | Protein Description                           | FC* | Subcellular fraction** | Coverage (%) | <i>M.tb.</i> H37Rv (ortholog) |
|----------------|----------------|-----------------------------------------------|-----|------------------------|--------------|-------------------------------|
| ML2198         | <i>cysA2</i>   | Probable thiosulfate sulfurtransferase        | 7   | N.d.                   | 12.6         | Rv0815c                       |
| ML2230c        | <i>purB</i>    | Purine Biosynthesis                           | 7   | N.d.                   | 4.9          | Rv0777                        |
| <b>ML2276c</b> | <i>ml2276c</i> | Oxidoreductase                                | 7   | N.d.                   | 12.7         | Rv0561c                       |
| ML2322c        | <i>asd</i>     | Aspartate-semialdehyde dehydrogenase          | 7   | Memb.                  | 7.7          | Rv3708c                       |
| ML2419c        | <i>hemB</i>    | Porphyrin and heme biosynthesis               | 7   | Cw                     | 6.7          | Rv0512                        |
| ML2420c        | <i>hemD</i>    | Probable uroporphyrin-III c-methyltransferase | 7   | N.d.                   | 12.3         | Rv0511                        |
| ML2501         | <i>ml2501</i>  | Iron-sulfur-binding reductase                 | 7   | Cw                     | 4.5          | Rv0338c                       |
| ML2659c        | <i>pepA</i>    | Serine protease                               | 7   | Memb.                  | 5            | Rv0125                        |
| ML0565         | <i>whiA</i>    | Transcriptional regulatory protein            | 9   | Nd 9                   | 8.9          | Rv1423                        |
| ML1286         | <i>ml1286</i>  | Two-component system                          | 9   | Cw                     | 23.4         | Rv1626                        |
| ML1753c        | <i>ml1753c</i> | Transcriptional regulatory protein            | 9   | N.d.                   | 2.5          | Rv1358                        |
| ML2124         | <i>prbB</i>    | Two component sensor histidine kinase         | 9   | N.d.                   | 4.3          | Rv0902c                       |
| ML2302         | <i>ml2302</i>  | Probable transcriptional regulatory protein   | 9   | Cyt./Memb./Cw          | 32.6         | Rv3676                        |
| ML0798c        | <i>ml0798c</i> | Conserved hypothetical protein                | 10  | N.d.                   | 9.6          | Rv2787                        |
| ML1809         | <i>ml1809</i>  | Conserved hypothetical protein                | 10  | N.d.                   | 7.2          | Rv1480                        |
| ML2031         | <i>ml2031</i>  | Conserved hypothetical protein                | 10  | Cw                     | 15.9         | Rv1883c                       |
| <b>ML2309</b>  | <i>ml2309</i>  | Conserved hypothetical protein                | 10  | N.d.                   | 10.9         | Rv3683                        |
| ML2333         | <i>ml2333</i>  | Conserved hypothetical protein                | 10  | N.d.                   | 5.2          | Rv3719                        |
| ML2427c        | <i>ml2427</i>  | Conserved hypothetical protein                | 10  | N.d.                   | 7.4          | Rv0502                        |

N.d- Not determined

The confidence interval was of 100% to all identified proteins.

The bold proteins (ML2276c and ML2309) were identified for the first in this work.

\*The leproma identification (ID) and the functional category (FC) were obtained from Leproma ( <http://genolist.pasteur.fr/Leproma/>).

\*\*The subcellular localization was obtained from data previously described in the literature (1; 4 and 5 ). The abbreviations Cyt, Cw and Memb mean, respectively, cytosolic, cell wall and membrane fractions.

**TABLE S4: False positive proteins identified in *M. leprae* cell surface**

| Leproma(ID)* | Gene         | Protein Description                                                    | FC* | <i>M.tb.</i> H37Rv (ortholog) |
|--------------|--------------|------------------------------------------------------------------------|-----|-------------------------------|
| ML0726c      | <i>accA3</i> | Probable bifunctional protein acetyl-/propionyl-coenzyme A carboxylase | 1   | Rv3285                        |
| ML0731c      | <i>accD5</i> | Probable propionyl-CoA carboxylase                                     | 1   | Rv3280                        |
| ML0540       | <i>mihF</i>  | Putative integration host factor                                       | 2   | Rv1388                        |
| ML0853       | <i>rpsO</i>  | 30S ribosomal protein                                                  | 2   | Rv2785c                       |
| ML0987       | <i>recA</i>  | Recombinase protein                                                    | 2   | Rv2737c                       |
| ML1133       | <i>rpmE</i>  | Probable 50s ribosomal protein                                         | 2   | Rv1298                        |
| ML1854c      | <i>rpsQ</i>  | Probable 30s ribosomal protein                                         | 2   | Rv0710                        |
| ML1863c      | <i>rplC</i>  | Probable 50s ribosomal protein                                         | 2   | Rv0701                        |
| ML1960c      | <i>rpsM</i>  | Probable 30s ribosomal protein                                         | 2   | Rv3460c                       |
| ML0234       | <i>lsr2</i>  | 15 kDa antigen                                                         | 3   | Rv3597c                       |
| ML0150c      | <i>pgi</i>   | Phosphoglucose isomerase                                               | 7   | Rv0946c                       |
| ML0450c      | <i>snzP</i>  | Possible pyridoxine biosynthesis                                       | 7   | Rv2606c                       |
| ML1712c      | <i>fixA</i>  | Probable electron transfer flavoprotein                                | 7   | Rv3029c                       |
| ML2440c      | <i>senX3</i> | Putative two component sensor histidine kinase                         | 9   | Rv0490                        |

The confidence interval was of 100% to all identified proteins.

\*The leproma identification (ID) and the functional category (FC) were obtained from Leproma ( <http://genolist.pasteur.fr/Leproma/>).

## References

1. **Marques MA, Mahapatra S, Nandan D, Dick T, Sarno EN, Brennan PJ, Vidal Pessolani MC.** 2000. Bacterial and host derived cationic proteins bind alpha2-laminins and enhance *Mycobacterium leprae* attachment to human Schwann cells. *Microb. Infect.* **2**: 1407–1417.
2. **Rambukkana A, Das PK, Burggraaf JD, Faber WR, Teeling P, Krieg S, Thole JE, Harboe M.** 1992. Identification and characterization of epitopes shared between the mycobacterial 65-kilodalton heat shock protein and the actively secreted antigen 85 complex: their in situ expression on the cell wall surface of *Mycobacterium leprae*. *Infect Immun.* **60** (11):4517-4527.
3. **Pessolani MC, Brennan PJ.** 1992. *Mycobacterium leprae* produces extracellular homologs of the antigen 85 complex. *Infect Immun.* **60** (11):4452-9.
4. **Marques MAM, Neves-Ferreira AGC, Xavier da Silveira EK, Valente RH, Chapeaurouge A, Perales J, Bernardes RS, Dobos KM, Spencer JS, Brennan PJ, Pessolani MCV.** 2008. Deciphering the proteomic profile of *Mycobacterium leprae* cell envelope. *Proteomics.* **8**: 2477–2491.
5. **Marques MA, Espinosa BJ, Xavier da Silveira EK, Pessolani MC, Chapeaurouge A, Perales J, Dobos KM, Belisle JT, Spencer JS, Brennan PJ.** 2004. Continued proteomic analysis of *Mycobacterium leprae* subcellular fractions. *Proteomics* **4**: 2942–2953.
6. **Marques MA, Chitale S, Brennan PJ, Pessolani MC.** 1998. Mapping and identification of the major cell wall-associated components of *Mycobacterium leprae*. *Infect Immun.* **66**(6):2625-31.
